# Supplementary material
Source: HighWire-hosted journal article supplement (https://jech.bmj.com/content/71/6/536)

Supplementary figure 1

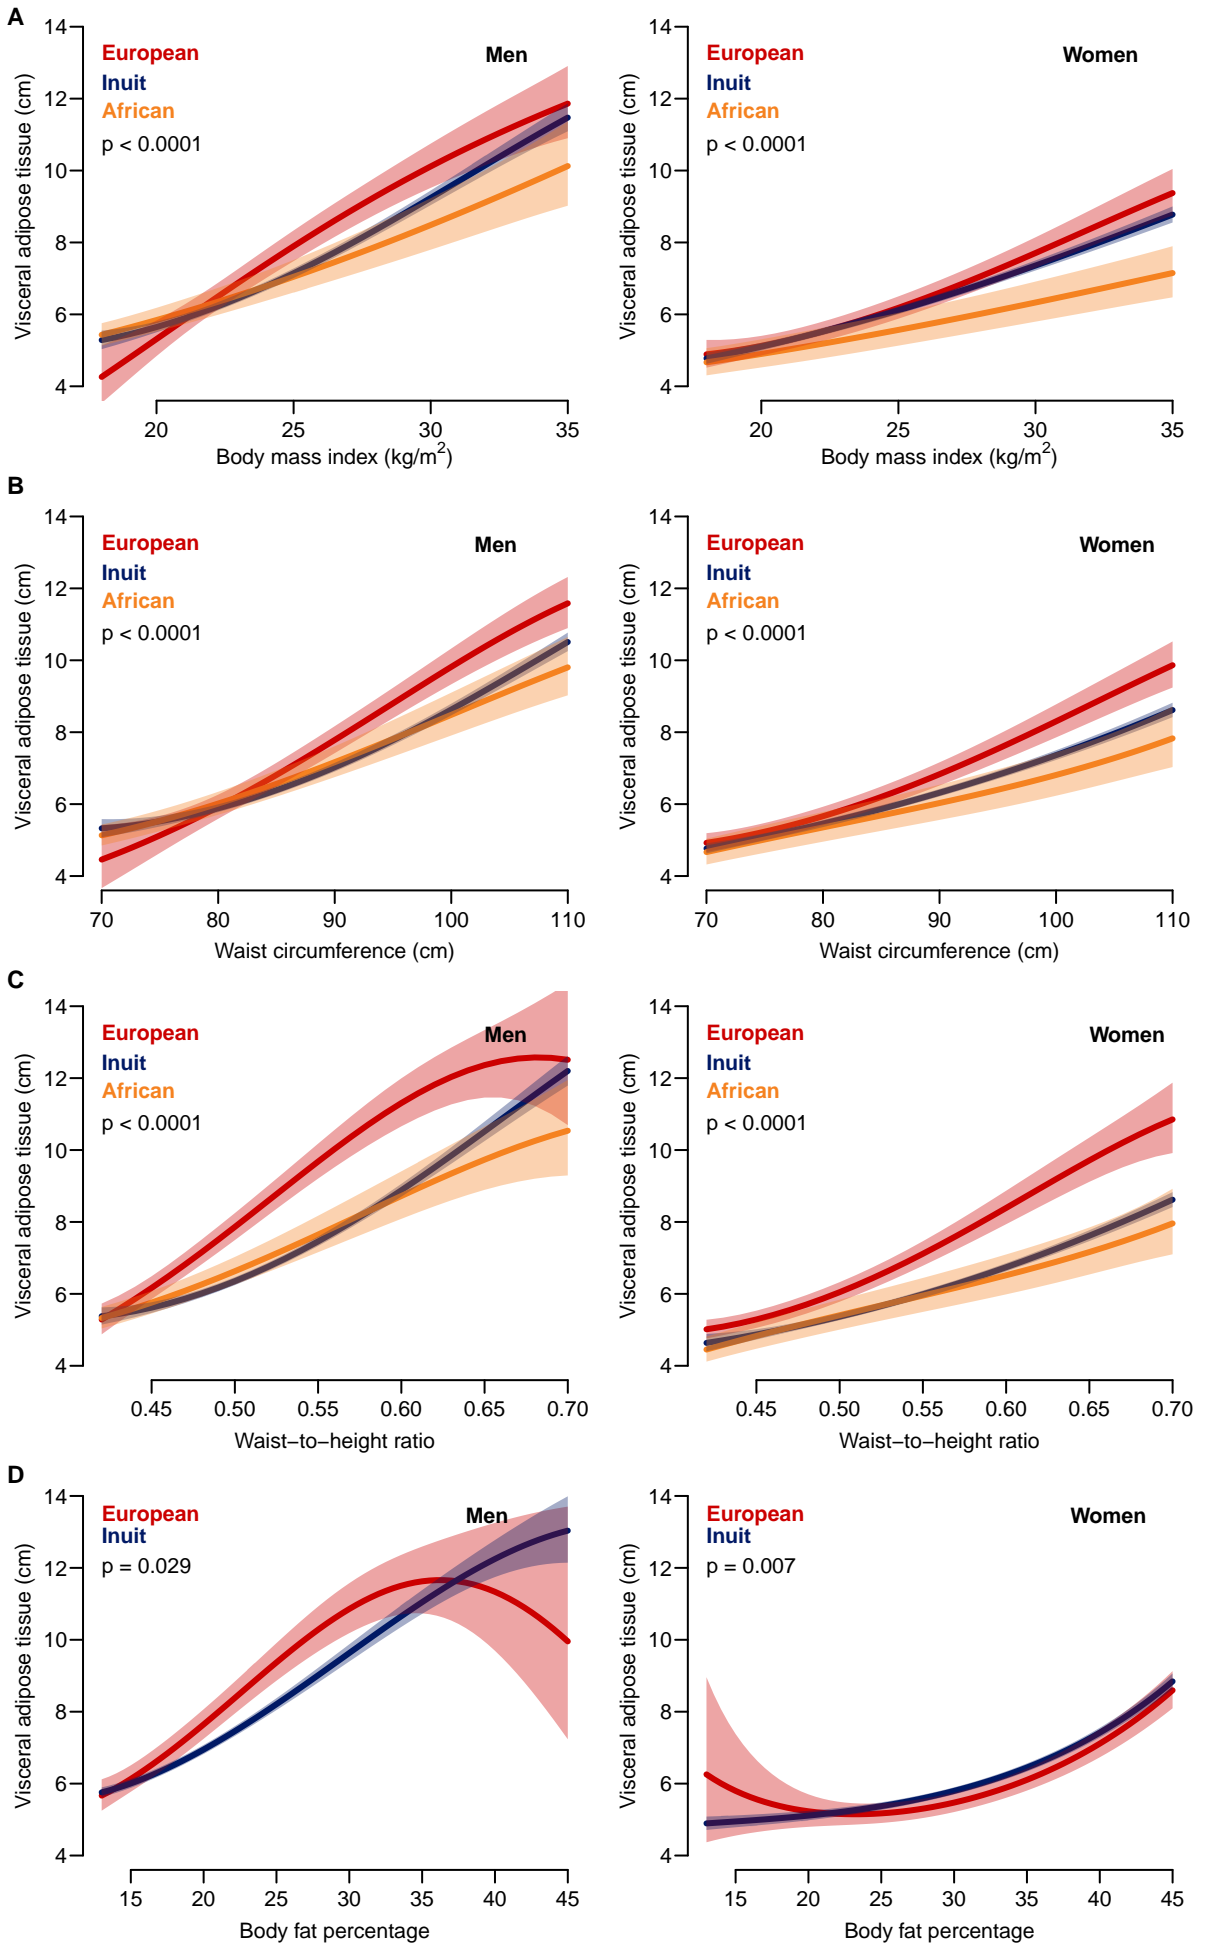

Supplementary figure 2

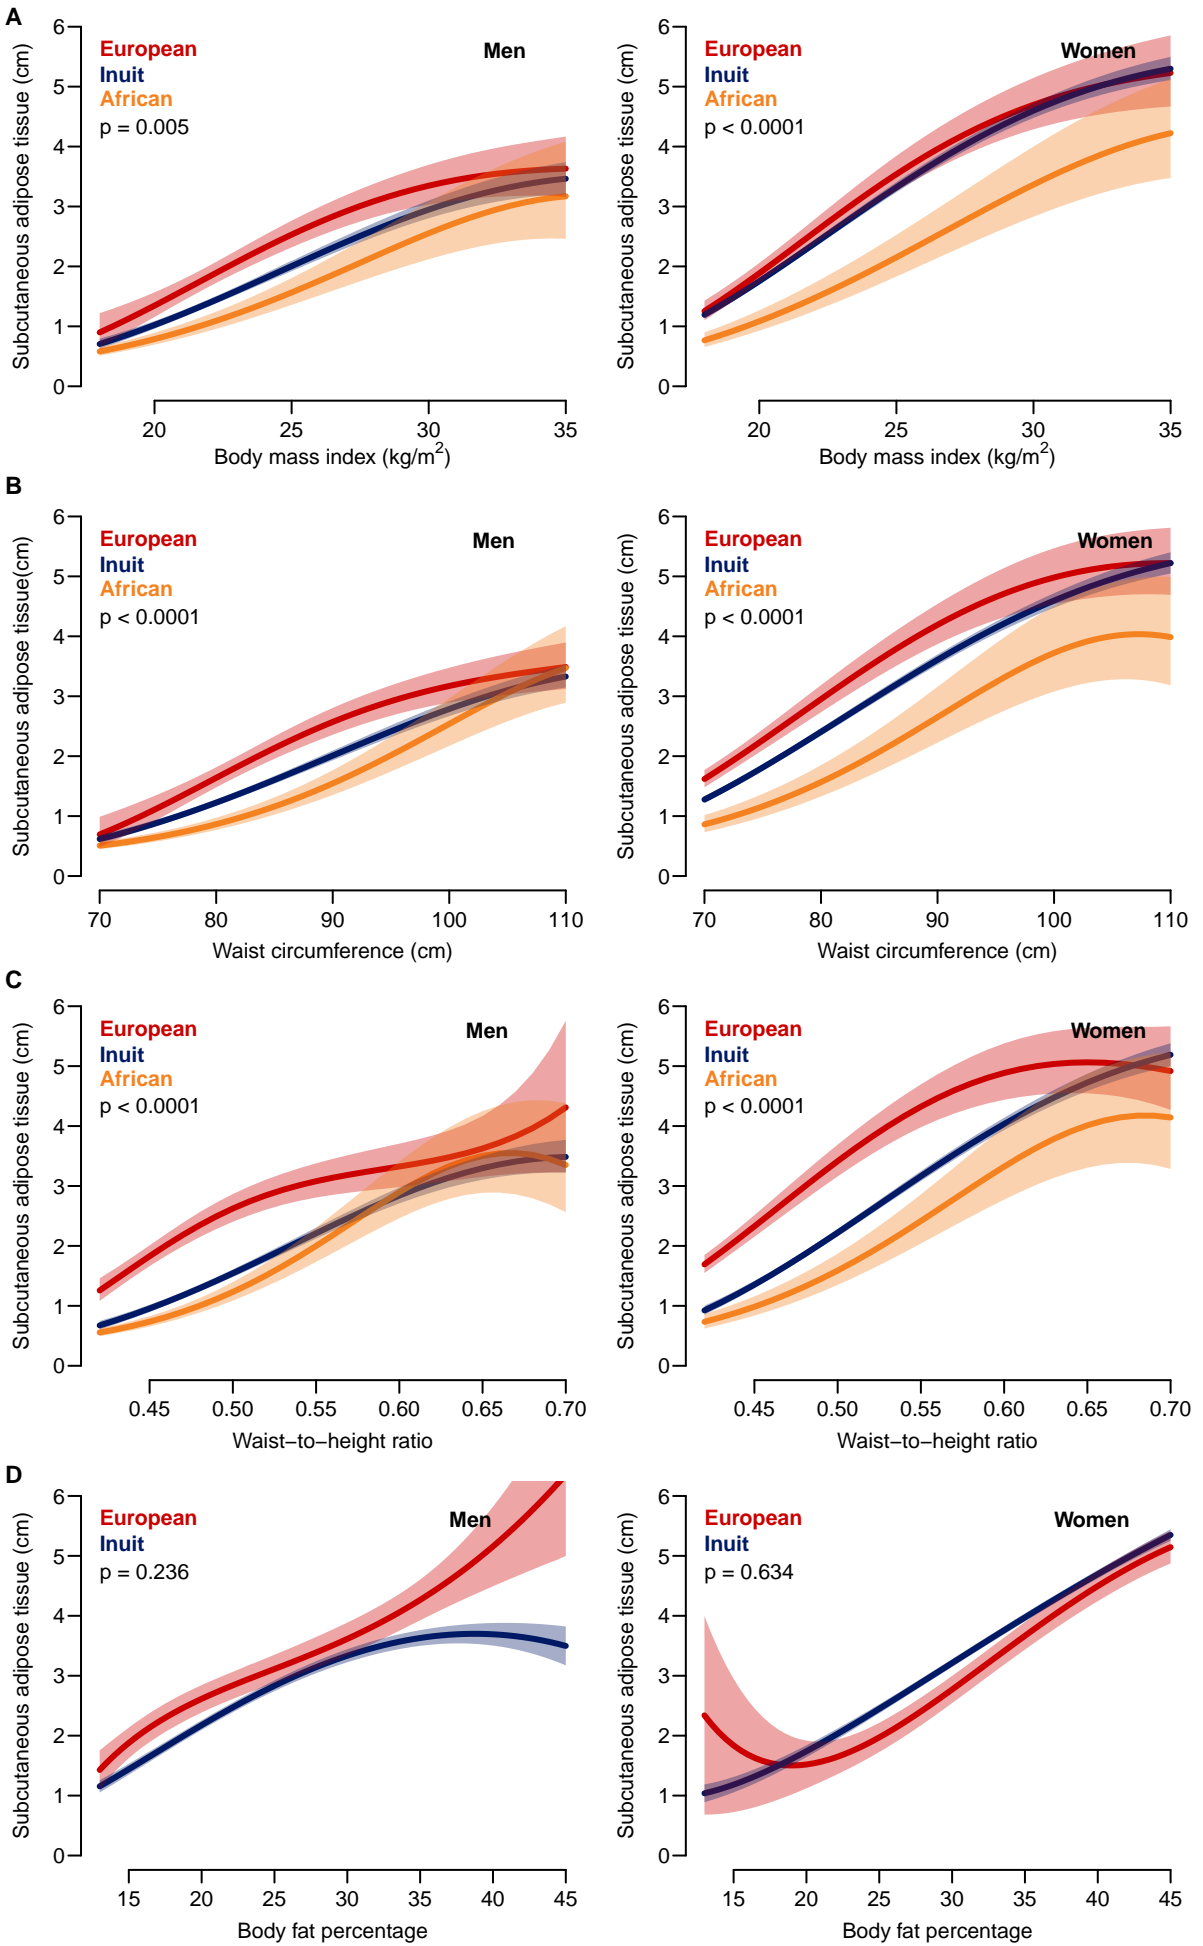

Supplementary figure 3

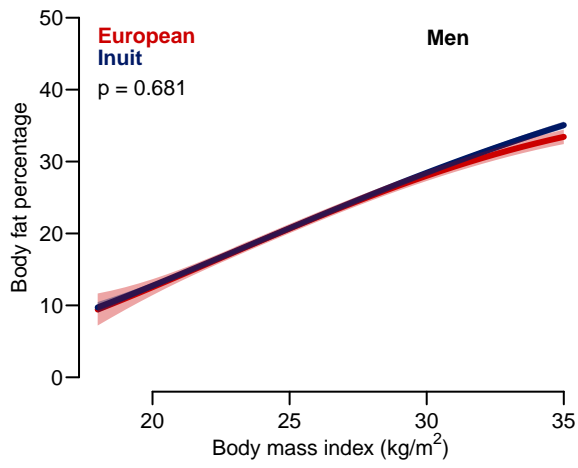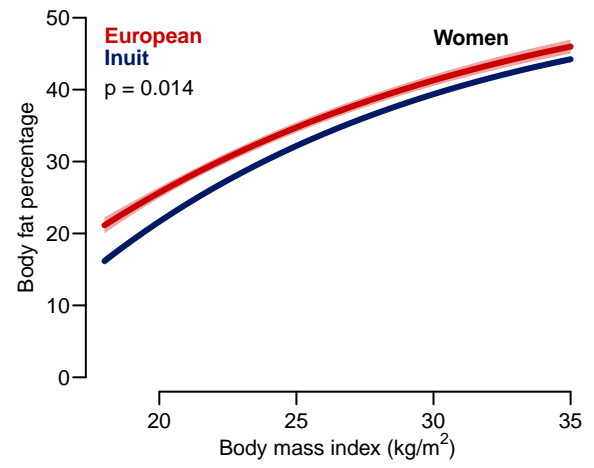

Supplement: inline-supplementary-material-1 [file inline-supplementary-material-1.pdf]
